# Supplementary material for: Genome and Genetic Engineering of the House Cricket (Acheta domesticus): A Resource for Sustainable Agriculture
Source: MDPI journal article supplement (doi:10.3390/biom13040589), 2023-03-24

Figure S6a

Correlation between total repeat content and genome size

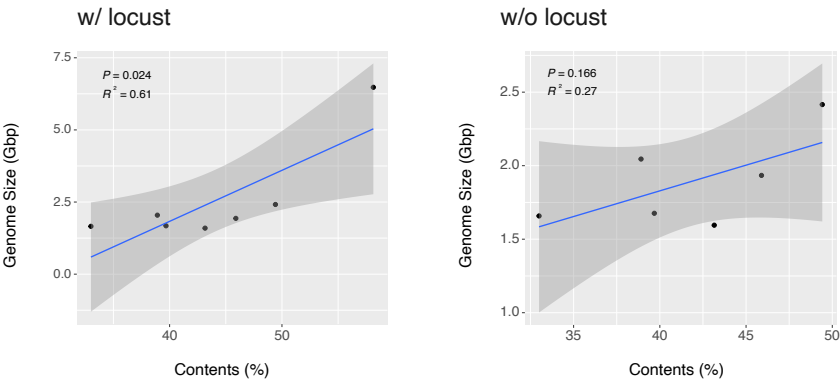

Correlation between major TEs contents and genome size in crickets (w/o locust)

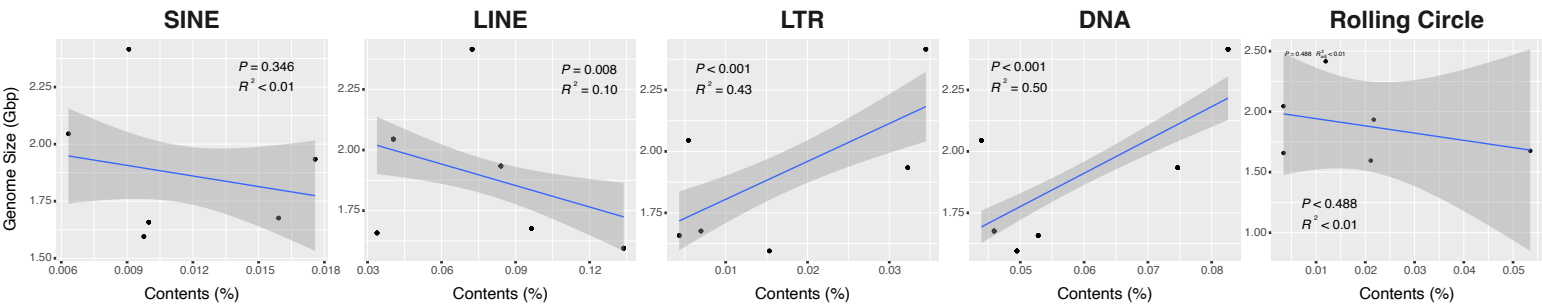

Figure S6b

Correlation between total repeat content and median length of intron

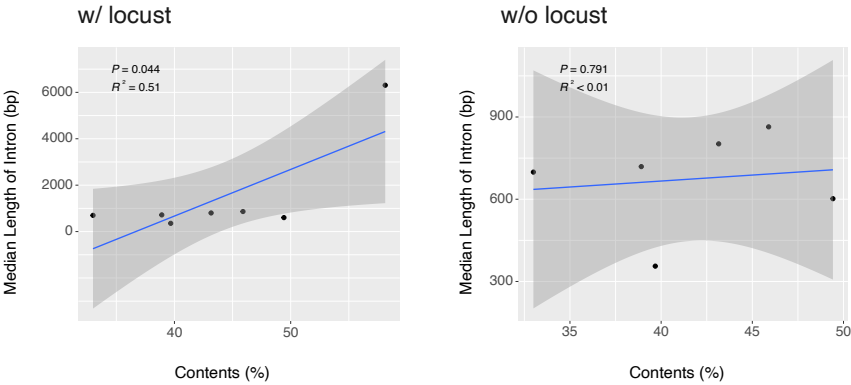

Correlation between major TEs contents and median length of intron (w/o locust)

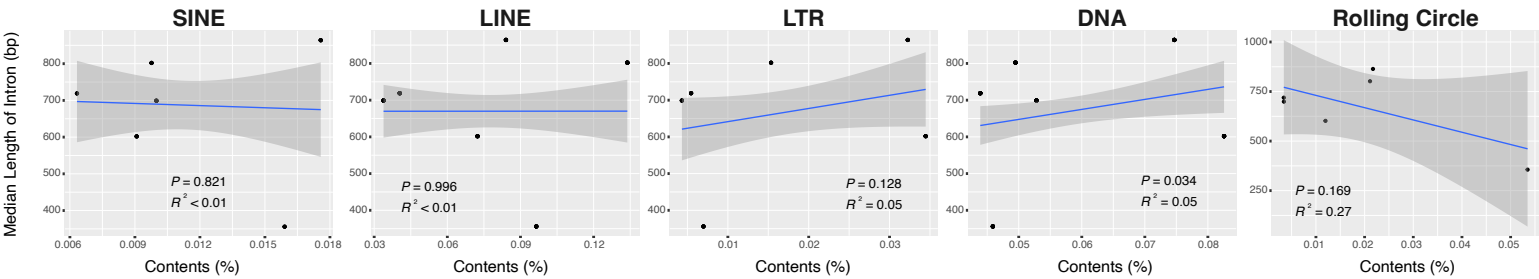

Figure S6c

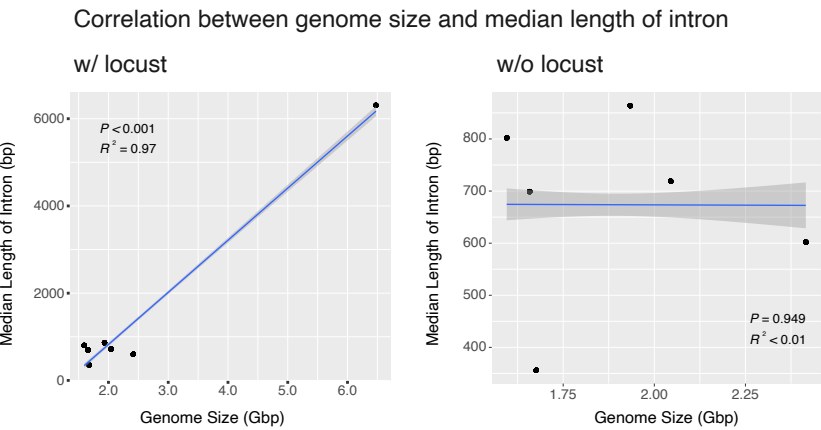

Figure S6d

LTR

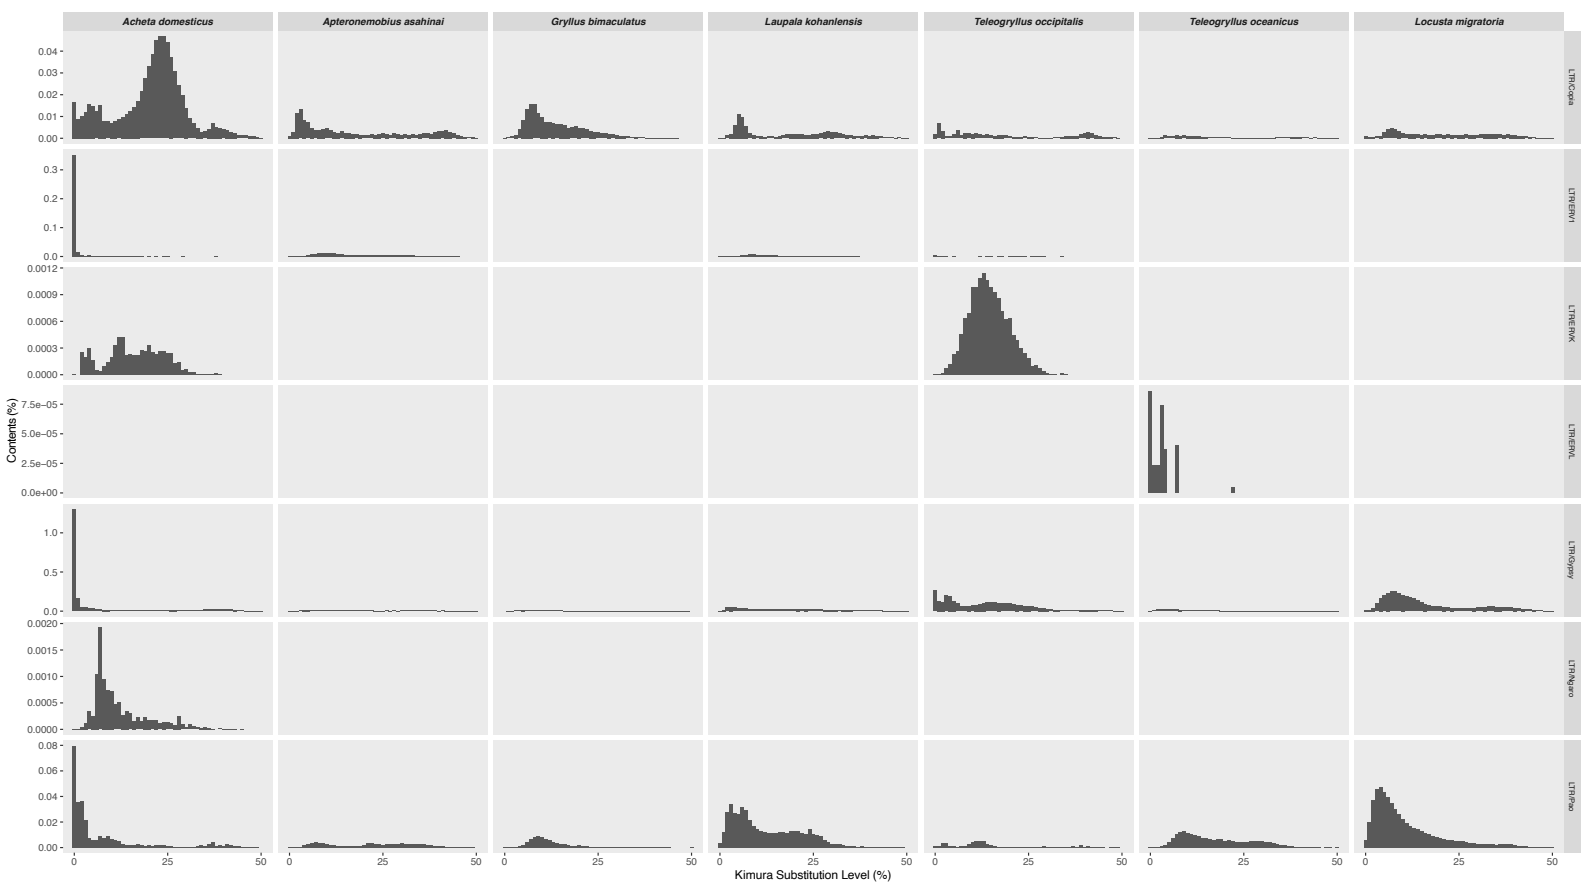

Figure S6e

LINE

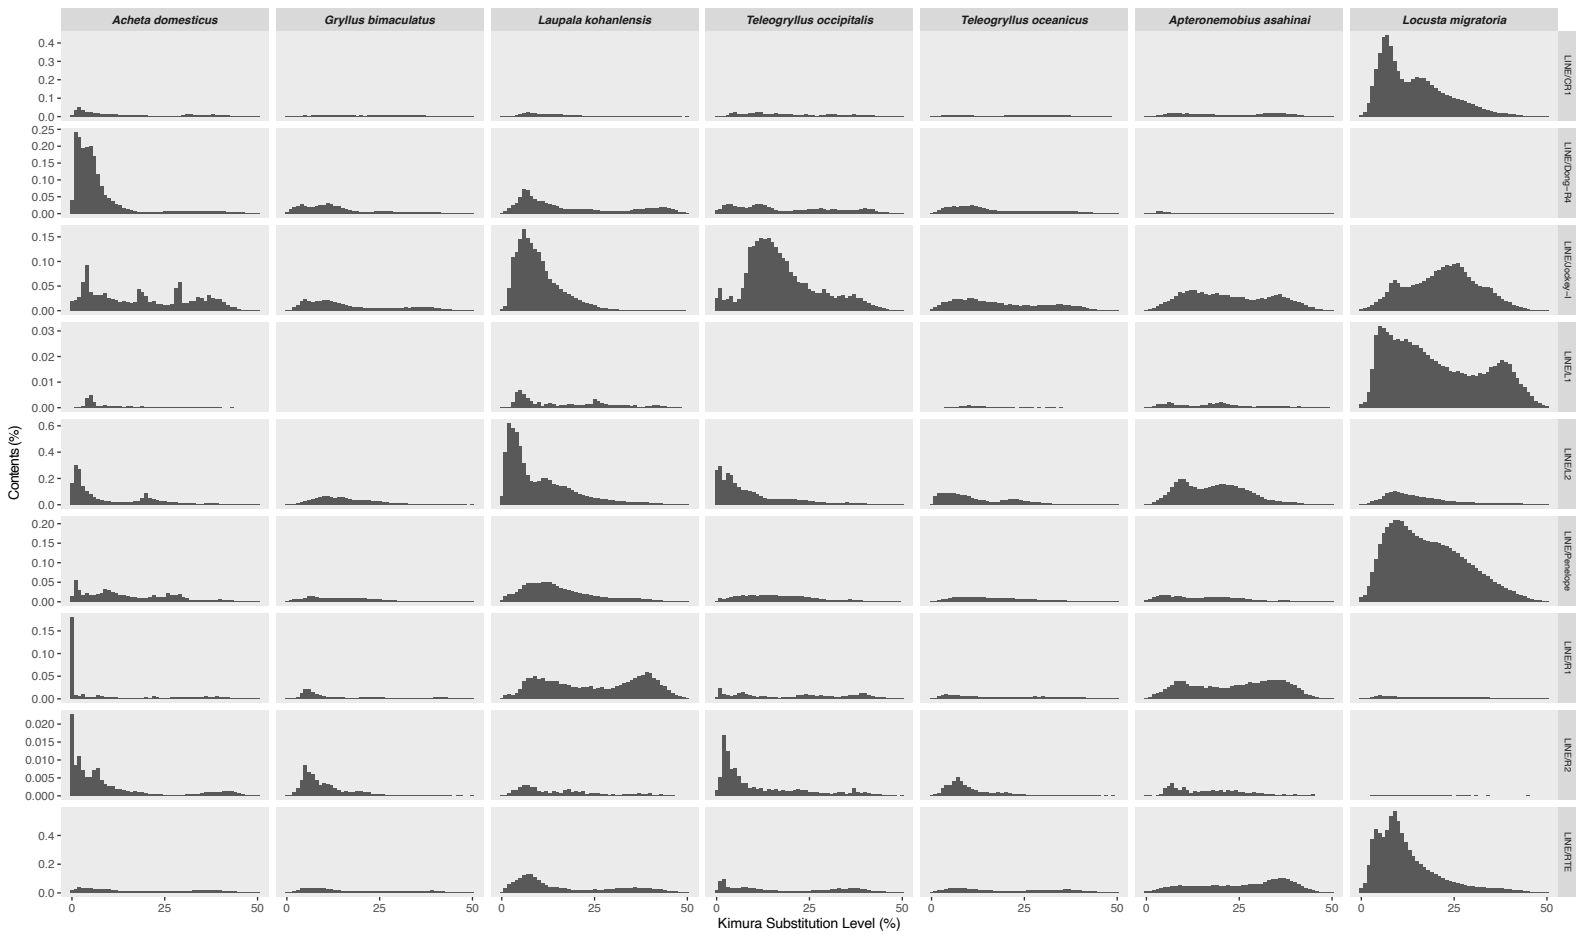

Figure S6f

DNA

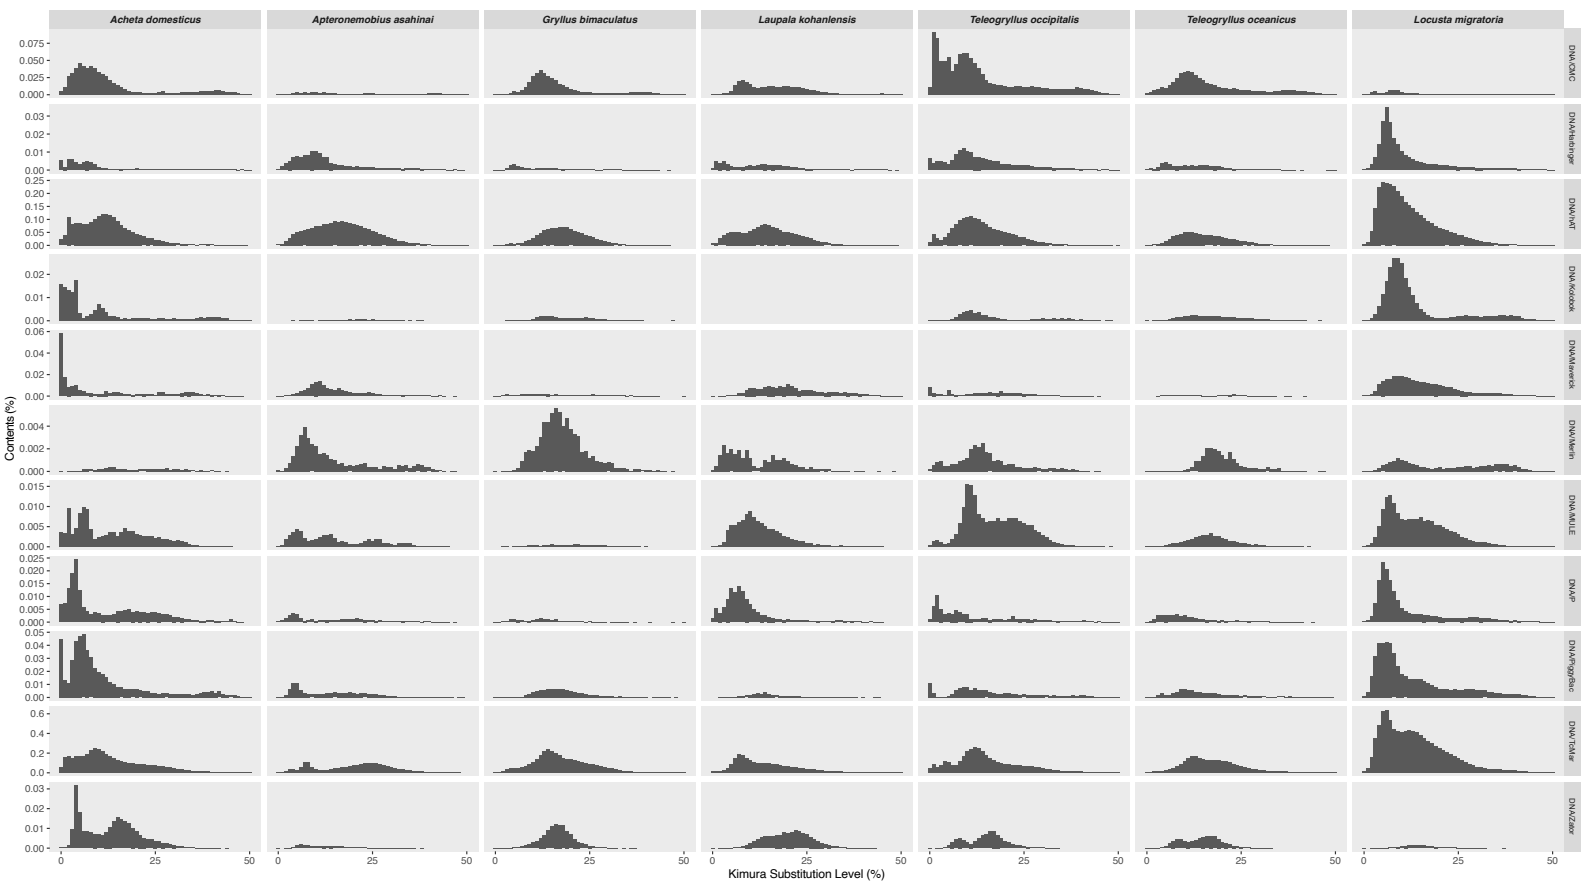

Supplement: s1 [file s1]
